# Supplementary material for: Integrative Analysis Revealing Human Heart-Specific Genes and Consolidating Heart-Related Phenotypes
Source: Front Genet. 2020 Jul 30;11:777. doi: 10.3389/fgene.2020.00777 (PMC7438927; doi:10.3389/fgene.2020.00777)
Supplement: Supplementary file 2 [file Table_1.XLSX]

## Sheet: Atrial_Appendage
Atrial appendage-specific/enhanced genes
Median	ID	ID with version number	Gene name	Type	Alias
All 5 folds*	ENSG00000163217	ENSG00000163217.1	BMP10	protein_coding
	ENSG00000175206	ENSG00000175206.6	NPPA	protein_coding
	ENSG00000106631	ENSG00000106631.4	MYL7	protein_coding
	ENSG00000197616	ENSG00000197616.7	MYH6	protein_coding
	ENSG00000120937	ENSG00000120937.8	NPPB	protein_coding
	ENSG00000198336	ENSG00000198336.5	MYL4	protein_coding
	ENSG00000129991	ENSG00000129991.8	TNNI3	protein_coding
	ENSG00000134571	ENSG00000134571.6	MYBPC3	protein_coding
	ENSG00000118194	ENSG00000118194.14	TNNT2	protein_coding
	ENSG00000148677	ENSG00000148677.6	ANKRD1	protein_coding
	ENSG00000205678	ENSG00000205678.3	TECRL	protein_coding
	ENSG00000227729	ENSG00000227729.2	RD3L	protein_coding	TDRD9AS1; TDRD9-AS1
	ENSG00000198812	ENSG00000198812.3	LRRC10	protein_coding
	ENSG00000187550	ENSG00000187550.4	SBK2	protein_coding	SGK069
	ENSG00000159251	ENSG00000159251.6	ACTC1	protein_coding
	ENSG00000221986	ENSG00000221986.2	MYBPHL	protein_coding	̶̶–
	ENSG00000164532	ENSG00000164532.10	TBX20	protein_coding
	ENSG00000140795	ENSG00000140795.8	MYLK3	protein_coding
	ENSG00000147485	ENSG00000147485.8	PXDNL	protein_coding	PMR1
	ENSG00000183873	ENSG00000183873.11	SCN5A	protein_coding
	ENSG00000183631	ENSG00000183631.4	PRR32	protein_coding	CXorf64
	ENSG00000231274	ENSG00000231274.4	SBK3	protein_coding	SGK110
	ENSG00000271952	ENSG00000271952.1	LINC01954	lincRNA
	ENSG00000234520	ENSG00000234520.1	HRAT17	lincRNA
	ENSG00000241135	ENSG00000241135.1	LINC00881	lincRNA
	ENSG00000232002	ENSG00000232002.1	LINC01880	lincRNA
	ENSG00000254002	ENSG00000254002.1	AC012574.2	lincRNA
	ENSG00000225519	ENSG00000225519.1	AL365434.1	lincRNA
	ENSG00000250891	ENSG00000250891.1	LINC02208	lincRNA
	ENSG00000235160	ENSG00000235160.1	LINC02248	lincRNA
	ENSG00000226063	ENSG00000226063.1	AC009531.1	lincRNA
	ENSG00000253122	ENSG00000253122.1	AC025366.1	lincRNA
	ENSG00000249145	ENSG00000249145.1	LINC02517	lincRNA
	ENSG00000248864	ENSG00000248864.1	AC114316.1	lincRNA
	ENSG00000231811	ENSG00000231811.2	AL159166.1	lincRNA
	ENSG00000254453	ENSG00000254453.1	NAV2-AS2	antisense
	ENSG00000215246	ENSG00000215246.4	AC116351.1	antisense
	ENSG00000235535	ENSG00000235535.3	TRDN-AS1	antisense
	ENSG00000243225	ENSG00000243225.2	AC007686.1	processed_pseudogene
	ENSG00000206820	ENSG00000206820.1	RNU1-138P	snRNA
	ENSG00000266553	ENSG00000266553.1	RN7SL356P	misc_RNA
5 folds, except 1	ENSG00000077009	ENSG00000077009.9	NMRK2	protein_coding	ITGB1BP3; MIBP; NRK2
	ENSG00000129170	ENSG00000129170.4	CSRP3	protein_coding
	ENSG00000183072	ENSG00000183072.9	NKX2-5	protein_coding
	ENSG00000172399	ENSG00000172399.5	MYOZ2	protein_coding
	ENSG00000184544	ENSG00000184544.7	DHRS7C	protein_coding	SDR32C2
	ENSG00000168334	ENSG00000168334.8	XIRP1	protein_coding
	ENSG00000163833	ENSG00000163833.6	FBXO40	protein_coding	FBX40; HOMT1B
	ENSG00000263155	ENSG00000263155.1	MYZAP	protein_coding	MYOZAP; GCOM1
	ENSG00000214097	ENSG00000214097.4	SMCO1	protein_coding	C3orf43
	ENSG00000169271	ENSG00000169271.1	HSPB3	protein_coding	HSPL27
	ENSG00000118972	ENSG00000118972.1	FGF23	protein_coding	ADHR
	ENSG00000203740	ENSG00000203740.3	METTL11B	protein_coding	NTM1B
	ENSG00000175398	ENSG00000175398.2	OR10P1	protein_coding	OR10P1P
	ENSG00000091482	ENSG00000091482.5	SMPX	protein_coding	DFNX4; DFN6
	ENSG00000145244	ENSG00000145244.7	CORIN	protein_coding
	ENSG00000130528	ENSG00000130528.7	HRC	protein_coding
	ENSG00000124743	ENSG00000124743.5	KLHL31	protein_coding	BKLHD6
	ENSG00000121769	ENSG00000121769.3	FABP3	protein_coding
	ENSG00000153531	ENSG00000153531.8	ADPRHL1	protein_coding	ARH2
	ENSG00000163492	ENSG00000163492.9	CCDC141	protein_coding	CAMDI
	ENSG00000108556	ENSG00000108556.7	CHRNE	protein_coding	ACHRE
	ENSG00000078814	ENSG00000078814.11	MYH7B	protein_coding
	ENSG00000236719	ENSG00000236719.2	OVAAL	lincRNA
	ENSG00000232310	ENSG00000232310.2	AL078590.3	lincRNA
	ENSG00000258602	ENSG00000258602.1	LINC01629	lincRNA
	ENSG00000250497	ENSG00000250497.1	AC007126.1	lincRNA
	ENSG00000253842	ENSG00000253842.1	AP003472.2	lincRNA
	ENSG00000237596	ENSG00000237596.2	AL138828.1	antisense
	ENSG00000270488	ENSG00000270488.1	AC079587.1	processed_pseudogene
	ENSG00000226306	ENSG00000226306.6	NPY6R	transcribed_processed_pseudogene
	ENSG00000244018	ENSG00000244018.1	RPL35P6	processed_pseudogene
	ENSG00000235573	ENSG00000235573.2	AC005005.2	processed_pseudogene
	ENSG00000236958	ENSG00000236958.1	AC051618.1	sense_intronic
	ENSG00000199550	ENSG00000199550.1	RF00019	misc_RNA
5 folds, except 2	ENSG00000198796	ENSG00000198796.6	ALPK2	protein_coding	HAK
	ENSG00000232056	ENSG00000232056.1	AC092687.1	lincRNA
	ENSG00000258667	ENSG00000258667.1	HIF1A-AS2	lincRNA
	ENSG00000255772	ENSG00000255772.1	LINC01479	lincRNA
	ENSG00000267257	ENSG00000267257.1	AC105105.1	antisense
	ENSG00000235205	ENSG00000235205.1	TATDN2P3	processed_pseudogene
* All pairwise comparisons of median values from atrial appendage tissue with other tissues resulted in more than 5 fold.
# Functionally unknown genes in the heart are highlighted with green.
## Red fonts represent heart-specific/enhanced genes only present in atrial appendage, not in left ventricle.
### Grey highlights indicate information is not available regarding the heart or information is not relevant to the heart.
N/A, not available

## Sheet: Left_Ventricle
Left ventricle-specific/enhanced genes
Median	ID	ID with version number	Gene name	Type	Alias
All 5 folds*	ENSG00000129991	ENSG00000129991.8	TNNI3	protein_coding
	ENSG00000134571	ENSG00000134571.6	MYBPC3	protein_coding
	ENSG00000198812	ENSG00000198812.3	LRRC10	protein_coding
	ENSG00000118194	ENSG00000118194.14	TNNT2	protein_coding
	ENSG00000227729	ENSG00000227729.2	RD3L	protein_coding	TDRD9AS1; TDRD9-AS1
	ENSG00000205678	ENSG00000205678.3	TECRL	protein_coding
	ENSG00000148677	ENSG00000148677.6	ANKRD1	protein_coding
	ENSG00000106631	ENSG00000106631.4	MYL7	protein_coding
	ENSG00000197616	ENSG00000197616.7	MYH6	protein_coding
	ENSG00000159251	ENSG00000159251.6	ACTC1	protein_coding
	ENSG00000160808	ENSG00000160808.5	MYL3	protein_coding
	ENSG00000183873	ENSG00000183873.11	SCN5A	protein_coding
	ENSG00000163492	ENSG00000163492.9	CCDC141	protein_coding	CAMDI
	ENSG00000178055	ENSG00000178055.8	PRSS42	pseudogene	TESSP2
	ENSG00000241135	ENSG00000241135.1	LINC00881	lincRNA
	ENSG00000234520	ENSG00000234520.1	HRAT17	lincRNA
	ENSG00000226900	ENSG00000226900.1	AL451069.1	lincRNA
	ENSG00000231811	ENSG00000231811.2	AL159166.1	lincRNA
	ENSG00000236013	ENSG00000236013.1	AL357146.1	lincRNA
	ENSG00000250891	ENSG00000250891.1	LINC02208	lincRNA
	ENSG00000249145	ENSG00000249145.1	LINC02517	lincRNA
	ENSG00000232002	ENSG00000232002.1	LINC01880	lincRNA
	ENSG00000225519	ENSG00000225519.1	AL365434.1	lincRNA
	ENSG00000248864	ENSG00000248864.1	AC114316.1	lincRNA
	ENSG00000226063	ENSG00000226063.1	AC009531.1	lincRNA
	ENSG00000235535	ENSG00000235535.3	TRDN-AS1	antisense
	ENSG00000254453	ENSG00000254453.1	NAV2-AS2	antisense
	ENSG00000250981	ENSG00000250981.1	AC016650.1	antisense
	ENSG00000226306	ENSG00000226306.6	NPY6R	transcribed_processed_pseudogene
	ENSG00000226074	ENSG00000226074.4	PRSS44	transcribed_unprocessed_pseudogene
	ENSG00000221844	ENSG00000221844.2	DPP3P2	processed_pseudogene
	ENSG00000236958	ENSG00000236958.1	AC051618.1	sense_intronic
5 folds, except 1	ENSG00000129170	ENSG00000129170.4	CSRP3	protein_coding
	ENSG00000214097	ENSG00000214097.4	SMCO1	protein_coding	C3orf43
	ENSG00000077009	ENSG00000077009.9	NMRK2	protein_coding	ITGB1BP3; MIBP; NRK2
	ENSG00000183072	ENSG00000183072.9	NKX2-5	protein_coding
	ENSG00000172399	ENSG00000172399.5	MYOZ2	protein_coding
	ENSG00000140795	ENSG00000140795.8	MYLK3	protein_coding
	ENSG00000092054	ENSG00000092054.12	MYH7	protein_coding
	ENSG00000111245	ENSG00000111245.10	MYL2	protein_coding
	ENSG00000168334	ENSG00000168334.8	XIRP1	protein_coding
	ENSG00000169271	ENSG00000169271.1	HSPB3	protein_coding	HSPL27
	ENSG00000130528	ENSG00000130528.7	HRC	protein_coding
	ENSG00000120937	ENSG00000120937.8	NPPB	protein_coding
	ENSG00000121769	ENSG00000121769.3	FABP3	protein_coding
	ENSG00000147485	ENSG00000147485.8	PXDNL	protein_coding	PMR1
	ENSG00000164532	ENSG00000164532.10	TBX20	protein_coding
	ENSG00000091482	ENSG00000091482.5	SMPX	protein_coding	DFNX4; DFN6
	ENSG00000131730	ENSG00000131730.11	CKMT2	protein_coding	SMTCK
	ENSG00000163833	ENSG00000163833.6	FBXO40	protein_coding	FBX40; HOMT1B
	ENSG00000124743	ENSG00000124743.5	KLHL31	protein_coding	BKLHD6
	ENSG00000203740	ENSG00000203740.3	METTL11B	protein_coding	NTM1B
	ENSG00000036448	ENSG00000036448.5	MYOM2	protein_coding	TTNAP
	ENSG00000153531	ENSG00000153531.8	ADPRHL1	protein_coding	ARH2
	ENSG00000121577	ENSG00000121577.9	POPDC2	protein_coding	POP2
	ENSG00000102683	ENSG00000102683.6	SGCG	protein_coding	35DAG
	ENSG00000078814	ENSG00000078814.11	MYH7B	protein_coding
	ENSG00000175206	ENSG00000175206.6	NPPA	protein_coding
	ENSG00000236719	ENSG00000236719.2	OVAAL	lincRNA
	ENSG00000254002	ENSG00000254002.1	AC012574.2	lincRNA
	ENSG00000253842	ENSG00000253842.1	AP003472.2	lincRNA
	ENSG00000250497	ENSG00000250497.1	AC007126.1	lincRNA
	ENSG00000271952	ENSG00000271952.1	LINC01954	lincRNA
	ENSG00000263443	ENSG00000263443.1	AC100872.1	lincRNA
	ENSG00000237377	ENSG00000237377.2	AC005703.2	lincRNA
	ENSG00000238102	ENSG00000238102.1	AL080248.1	lincRNA
	ENSG00000258444	ENSG00000258444.1	AL132855.1	antisense
	ENSG00000267784	ENSG00000267784.1	AC010680.1	antisense
	ENSG00000244018	ENSG00000244018.1	RPL35P6	processed_pseudogene
	ENSG00000251286	ENSG00000251286.2	AC097522.1	processed_pseudogene
	ENSG00000261434	ENSG00000261434.1	AC021087.4	sense_overlapping
5 folds, except 2	ENSG00000121743	ENSG00000121743.3	GJA3	protein_coding	CTRCT14
	ENSG00000122367	ENSG00000122367.15	LDB3	protein_coding
	ENSG00000198626	ENSG00000198626.11	RYR2	protein_coding
	ENSG00000151729	ENSG00000151729.6	SLC25A4	protein_coding
	ENSG00000253270	ENSG00000253270.1	AC090541.1	lincRNA
	ENSG00000249116	ENSG00000249116.1	AC025183.1	antisense
	ENSG00000215246	ENSG00000215246.4	AC116351.1	antisense
	ENSG00000199550	ENSG00000199550.1	RF00019	misc_RNA
* All pairwise comparisons of median values from left ventricle tissue with other tissues resulted in more than 5 fold.
# Functionally unknown genes in the heart are highlighted with green.
## Red fonts represent heart-specific/enhanced genes only present in left ventricle, not in atrial appendage.
### Grey highlights indicate information is not available regarding the heart or information is not relevant to the heart.
N/A, not available

## Sheet: Unknown
Atrial appendage-specific/enhanced protein-coding genes which are functionally unknown in the heart
Median	ID	Gene name	Relative median value**	Median FC of heart < 5 (Ratio to heart; more than 0.20)
All 5 folds*	ENSG00000227729.2	RD3L	479.098	None
	ENSG00000187550.4	SBK2	472.981	None
	ENSG00000183631.4	PRR32 (CXorf64)	71.18	None
	ENSG00000231274.4	SBK3	70.6394	None
5 folds, except 1	ENSG00000163833.6	FBXO40	52.41	Muscle - Skeletal (0.72)
	ENSG00000214097.4	SMCO1	50.21	Muscle - Skeletal (0.48)
	ENSG00000108556.7	CHRNE	19.73	Pituitary (0.94)
FC fold change (heart/other tissues)
* All median FC between heart and other tissues > 5.
** Heart median / average of medians from other tissues
Left ventricle-specific/enhanced protein-coding genes which are functionally known in the heart
Median	ID	Gene name	Relative median value**	Median FC of heart < 5 (Ratio to heart; more than 0.20)
All 5 folds*	ENSG00000227729.2	RD3L	618.044	None
5 folds, except 1	ENSG00000214097.4	SMCO1	117.84	Muscle - Skeletal (0.21)
	ENSG00000163833.6	FBXO40	41.13	Muscle - Skeletal (0.92)
FC fold change (heart/other tissues)
* All median FC between heart and other tissues > 5.
** Heart median / average of medians from other tissues
# Functionally unknown genes in the heart are highlighted with green.
## Red fonts represent heart-specific/enhanced genes only present in atrial appendage, not in left ventricle.
## Blue fonts represent heart-specific/enhanced genes only present in left ventricle, not in atrial appendage.

## Sheet: Tissue_samples
List of human tissue samples used in the current analysis
Tissue symbol	Original body site	Original sample number	Sample number after filtering	Pathway analysis
			(RIN ≥ 6.0)
A1	Heart - Atrial Appendage	297	280	Y
A2	Heart - Left Ventricle	303	271	Y
B	Muscle - Skeletal	564	560	Y
C	Artery - Aorta	299	271	Y
D	Artery - Coronary	173	158	Y
E	Artery - Tibial	441	422
F	Adipose - Subcutaneous	442	402	Y
G	Adipose - Visceral (Omentum)	355	324	Y
H	Adrenal - Gland	190	178	Y
I	Brain - Amygdala	100	88
J	Brain - Anterior cingulate cortex (BA24)	121	110
K	Brain - Caudate (basal ganglia)	160	155
L	Brain - Cerebellar Hemisphere	136	131
M	Brain - Cerebellum	173	164	Y
N	Brain - Cortex	158	140
O	Brain - Frontal Cortex (BA9)	129	121	Y
P	Brain - Hippocampus	123	111
Q	Brain - Hypothalamus	121	115
R	Brain - Nucleus accumbens (basal ganglia)	147	133
S	Brain - Putamen (basal ganglia)	124	117
T	Brain - Spinal cord (cervical c-1)	91	90
U	Brain - Substantia nigra	88	75
V	Breast - Mammary Tissue	290	256
W	Colon - Sigmoid	233	191
X (=X2)	Colon - Transverse	274	243	Y
Y	Esophagus - Gastroesophageal Junction	244	221
Z	Esophagus - Mucosa	407	391	Y
AA	Esophagus - Muscularis	370	338
AB	Kidney - Cortex	45	35
AC	Liver	175	154	Y
AD	Lung	427	397	Y
AE	Minor Salivary Gland	97	97
AF	Nerve - Tibial	414	371
AG	Ovary	133	129	Y
AH	Pancreas	248	233	Y
AI	Pituitary	183	169
AJ	Prostate	152	131
AK	Skin - Not Sun Exposed (Suprapubic)	387	368
AL	Skin - Sun Exposed (Lower leg)	473	453
AM	Small Intestine - Terminal Ileum	137	130	Y
AN	Spleen	162	147	Y
AO	Stomach	262	239	Y
AP	Testis	259	229	Y
AQ	Thyroid	446	407	Y
AR	Uterus	111	99
AS	Vagina	115	107
AT	Whole Blood	407	403
	Sum	6183	5718
	Max	564	560
	Min	88	75

## Sheet: Summary
57 protein coding heart specific/enhanced genes
Specificity/enhancement	Gene symbol
Atrial appendage	BMP10
Atrial appendage	MYL4
Atrial appendage	SBK2
Atrial appendage	MYBPHL
Atrial appendage	PRR32
Atrial appendage	SBK3
Atrial appendage	DHRS7C
Atrial appendage	MYZAP
Atrial appendage	FGF23
Atrial appendage	OR10P1
Atrial appendage	CORIN
Atrial appendage	CHRNE
Atrial appendage	ALPK2
Overlapping (common)	NPPA
Overlapping (common)	MYL7
Overlapping (common)	MYH6
Overlapping (common)	NPPB
Overlapping (common)	TNNI3
Overlapping (common)	MYBPC3
Overlapping (common)	TNNT2
Overlapping (common)	ANKRD1
Overlapping (common)	TECRL
Overlapping (common)	RD3L
Overlapping (common)	LRRC10
Overlapping (common)	ACTC1
Overlapping (common)	TBX20
Overlapping (common)	MYLK3
Overlapping (common)	PXDNL
Overlapping (common)	SCN5A
Overlapping (common)	NMRK2
Overlapping (common)	CSRP3
Overlapping (common)	NKX2-5
Overlapping (common)	MYOZ2
Overlapping (common)	XIRP1
Overlapping (common)	FBXO40
Overlapping (common)	SMCO1
Overlapping (common)	HSPB3
Overlapping (common)	METTL11B
Overlapping (common)	SMPX
Overlapping (common)	HRC
Overlapping (common)	KLHL31
Overlapping (common)	FABP3
Overlapping (common)	ADPRHL1
Overlapping (common)	CCDC141
Overlapping (common)	MYH7B
Left ventricle	MYL3
Left ventricle	PRSS42
Left ventricle	MYH7
Left ventricle	MYL2
Left ventricle	CKMT2
Left ventricle	MYOM2
Left ventricle	POPDC2
Left ventricle	SGCG
Left ventricle	GJA3
Left ventricle	LDB3
Left ventricle	RYR2
Left ventricle	SLC25A4
# Functionally unknown genes in the heart are highlighted with green.
## Red fonts represent heart-specific/enhanced genes only present in atrial appendage, not in left ventricle.
## Blue fonts represent heart-specific/enhanced genes only present in left ventricle, not in atrial appendage.
